# Supplementary material for: A genomic analysis reveals the diversity of cellulosome displaying bacteria
Source: Front Microbiol. 2024 Oct 30;15:1473396. doi: 10.3389/fmicb.2024.1473396 (PMC11557425; doi:10.3389/fmicb.2024.1473396)
Supplement: Supplementary file 2 [file Table_1.XLSX]

## Sheet: Table S1
Table S1: Glycoside hydrolase (GH) identifiers and activity
Carbohydrate-Active Enzymes (CAZymes)
Lignocellulosic Biomass (LCB) Active Enzymes
Cellulases			Hemicellulases			Oligosaccharidases			Unclassified GH Enzymes			Polysaccharide Lyases			Carbohydrate Esterases
GH (ID)	Activity		GH (ID)	Activity		GH (ID)	Activity		GH (ID)	Activity		PL (ID)	Activity		CE (ID)	Activity
GH5 (PF00150)	endo/exoglucanase		GH10 (PF00331)	endo-1,4-ß-xylanase		GH1 (PF00232)	ß-glucosidase exo-ß-1,4-glucanase ß-xylosidase ß-galactosidase ß-mannosidase		GH4 (PF02056)	6-P-α-glucosidase α-glucuronidase α-glucosidase β-glucosidase α-galactosidase Galacturonan α-1,4-galacturonidase 6-P-β-glucosidase		PL1 (PF00544)	Poly a-D-N-acetylgalactosaminuric acid lyase Pectin lyase Pectate lyase Exo-polygalacturonate lyase		CE1 (PF00756)	Trehalose 6-O-mycolyltransferase Diacylglycerol O-acyltransferase Carboxylic ester hydrolase Acetylxylan esterase Feruloyl esterase
GH6 (PF01341)	endo/exoglucanase		GH11 (PF00457)	endo-1,4-ß-xylanase		GH2 (PF02837)	ß-galactosidase		GH13 (PF02903)	α-1,6-maltooligosyltransferase α-glucosyltransferase Oligosaccharide α-4-glucosyltransferase Glucosylglycerate phosphorylase α-1,4-glucan: phosphate α-maltosyltransferase Maltose α-1,4-glucosidase		PL4 (PF09284)	Rhamnogalacturonan endolyase		CE2(N) (PF17996)	6-O-glycoside deacetylase Acetylmannan esterase Acetylesterase Acetylxylan esterase
GH7 (PF00840)	endoglucanase		GH16 (PF00722)	xyloglucanase		GH3 (PF00933)	ß-glucosidase exo-ß-1,3-1,4-glucanase 1,4-ß-xylosidase		GH14 (PF01373)	[inverting] β-amylase		PL10 (PF09492)	Pectate lyase		CE3 (PF00657)	Acetylesterase Acetylxylan esterase
GH8 (PF01270)	endoglucanase		GH26 (PF02156)	ß-mannanase; xylanase		GH29 (PF01120)	ɑ-fucosidase		GH15 (PF00723)	Dextran dextrinase [inverting] a-1,6-glucosidase / isomaltase a,a-trehalase [inverting] glucoamylase Glucodextranase		PL11 (cd10318)	Rhamnogalacturonan endolyase Rhamnogalacturonan exolyase		CE4 (PF01522)	Chitin oligosaccharide deacetylase Acetylesterase Acetylxylan esterase LPS deacetylase Poly-ß-1,6-N-acetylglucosamine deacetylase Peptidoglycan N-acetylglucosamine deacetylase Chitin deacetylase
GH9 (PF00759)	endo/exoglucanase		GH28 (PF00295)	galacturonase		GH35 (PF01301)	ß-galactosidase		GH18 (PF00704)	Nod factor hydrolase Chitin exo-ß-1,4-N-acetylglucosaminidase Di-N-acetylchitobiase / reducing-end exo-hexosaminidase Peptidoglycan endo-ß-1,4-N-acetylglucosaminidase Chitosanase Chitinase Chitin exo-ß-1,4-N-acetylglucobiosaminidase [reducing end] exo-chitinase ß-N-acetylhexosaminidase Mannosyl-glycoprotein endo-ß-N-acetylglucosaminidase		PL33 (PF07940)	Hyaluronate lyase Gellan lyase Chondroitin AC lyase		CE6 (PF03629)	Acetylxylan esterase
GH12 (PF01670)	endoglucanase		GH30 (PF02055)	endo-1,4-ß-xylanase; ß-glucosidase; ß-xylosidase		GH38 (PF01074)	ɑ-mannosidase		GH19 (PF00182)	Chitinase Lysozyme [reducing end] exo-chitinase					CE7 (PF05448)	Carboxylic ester hydrolase Cephalosporin-C deacetylase Acetylxylan esterase
GH44 (PF12891)	endoglucanase		GH43 (PF04616)	ß-xylosidase, endo-1,4-ß-xylanase, arabinanase		GH39 (PF01229)	ß-xylosidase		GH20 (PF00728)	ß-1,6-N-acetylglucosaminidase ß-N-acetyl-6-sulfo-glucosaminidase Lacto-N-biosidase ß-N-acetylhexosaminidase Mannosyl-glycoprotein endo-ß-N-acetylglucosaminidase					CE8 (PF01095)	Pectin methylesterase
GH45 (PF02015)	endoglucanase		GH53 (PF07745)	endo-1,4-ß-galactanase		GH42 (PF02449)	ß-galactosidase		GH24 (PF00959)	Lysozyme					CE9 (PF01979)	N-acetylglucosamine-6-phosphate deacetylase
GH48 (PF02011)	endo/exoglucanase		GH98 (PF08306)	endo-1,4-ß-xylanase		GH47 (PF01532)	ɑ-mannosidase		GH25 (PF01183)	Lysozyme					CE12 (cd00229)	Carboxylic ester hydrolase Pectin acetylesterase Acetylxylan esterase Rhamnogalacturonan acetylesterase
GH51 (PF06964)	endoglucanase		GH113 (cd19606)	ß-mannanase		GH52 (PF03512)	ß-xylosidase		GH27 (PF02065)	Galactan:galactan a-galactosyltransferase Galactomannan exo-a-1,6-galactosidase a-galactosidase a-N-acetylgalactosaminidase					CE15 (SSF53474)	4-O-methyl-glucuronoyl esterase
GH61 (PF03443)	endoglucanase		GH134 (PF21087)	ß-mannanase		GH59 (PF02057)	ß-galactosidase; galactocerebrosidase		GH29 (PF01120)	a-1,3-L-galactosidase a-1,4-L-fucosidase a-L-galactosidase a-L-glucosidase a-1,3-L-fucosidase a-1,6-L-fucosidase a-L-fucosidase a-1,2-L-fucosidase
Caption: List of Glycoside hydrolase (GH) enzymes used to predict degradative activity against cellulose, hemicellulose and oligosaccharides. The GH identifier and putative enzyme activity are provided as defined in the CAZy database. The Pfam (PF) or Conserved Domain (cd) database accession number are presented within the parentheses. Predicted degradative activity was obtained from Wang et al (…						GH92 (PF07971)	ɑ-mannosidase		GH31 (PF01055)	Oligosaccharide a-4-glucosyltransferase a-6-glucosyltransferase a-3-isomaltosyltransferase / cycloalternan-forming enzyme Exo-a-1,4-galactosidase Dextranase a-xylosidase Sulfoquinovosidase a-glucosidase Mannosyl-oligosaccharide a-1,3-glucosidase Exo-acting protein-a-N-acetylgalactosaminidase a-galactosidase a-mannosidase Exo-a-1,3-glucanase / a-1,3-glucosidase Exo-a-1,4-glucan lyase
									GH32 (PF00251)	Sucrose 6 acetate ß-2,1-fructosyltransferase 6-kestose ß-2,6-fructosidase ß-fructofuranosidase / invertase Endo-levanase / ß-2,6-fructanase Endo-inulinase Levan fructotransferase
									GH33 (PF02973)	Trans-sialidase 2-keto-3-deoxynononic acid hydrolase / KDNase Kdo hydrolase Exo-a-sialidase Anhydrosialidase
									GH36 (PF02065)	Stachyose synthase / galactinol-raffinose galactosyltransferase Raffinose synthase / galactinol-sucrose galactosyltransferase a-galactosaminidase Blood group B a-1,3-galactosidase Melibiose a-1,6-galactosidase Raffinose exo-a-1,6-galactosidase a-galactosidase a-N-acetylgalactosaminidase
									GH57 (PF03065)	α-galactosidase
									GH62 (PF03664)	a-1,3-L-arabinofuranosidase a-L-arabinofuranosidase Endo-ß-1,4-xylanase
									GH64 (PS52006)	Endo-β-1,3-glucanase
									GH65 (PF03636)	a-glucan phosphorylase [inverting] a,a-trehalose-6-phosphate phosphorylase Kojibiose phosphorylase [inverting] nigerose phosphorylase [inverting] 3-O-a-glucopyranosyl-L-rhamnose phosphorylase 1,2-a-glucosylglycerol phosphorylase 1,3-a-oligoglucan phosphorylase a,a-trehalose phosphorylase Maltose phosphorylase a-glucosyl-1,2-ß-galactosyl-L-hydroxylysine a-glucosidase Branched-dextran exo-a-1,2-glu…
									GH67 (PF03648)	Xylan α-1,2-(4-O-methyl)-glucuronidase (EC 3.2.1.131); α-glucuronidase
									GH68 (PF02435)	β-fructofuranosidase / invertase
									GH73 (PF01832)	Peptidoglycan endo-ß-1,4-N-acetylglucosaminidase Mannosyl-glycoprotein endo-ß-N-acetylglucosaminidase
									GH76 (PF03663)	Endo-a-1,6-mannanase a-glucosidase
									GH77 (PF02446)	4-α-glucanotransferase / amylomaltase
									GH78 (PF05592)	Isoflavone 7-O-glucosyl a-1,6-rhamnosidase Rhamnogalacturonan a-L-rhamnohydrolase a-L-rhamnosidase
									GH88 (PF07470)	D-4,5-unsaturated ß-glucuronyl hydrolase Gellan tetrasaccharide unsaturated glucuronosyl hydrolase Unsaturated chondroitin disaccharide hydrolase
									GH97 (PF10566)	a-glucosidase a-galactosidase Glucodextranase
									GH114 (PF03537)	endo-α-1,4-galactosaminidase
