# Supplementary material for: A genomic analysis reveals the diversity of cellulosome displaying bacteria
Source: Front Microbiol. 2024 Oct 30;15:1473396. doi: 10.3389/fmicb.2024.1473396 (PMC11557425; doi:10.3389/fmicb.2024.1473396)
Supplement: Supplementary file 3 [file Table_2.XLSX]

## Sheet: TableS2
Table S2: Genome Quality Statistics
Organism	GCF	Type	Contig L50	Contig N50 (kb)	# Contigs	Completeness (percentile)	Contamination
Acetivibrio alkalicellulosi (DSM 17461)	GCF_008125075.1 (Supressed)	Complex (High Doc) Acetobivrio	10	164.4	74	-	-
Acetivibrio cellulolyticus (CD2)	GCF_000179595.2	Complex (High Doc) Acetobivrio	16	127663	114	99.38 (100)	0.21
Acetivibrio clariflavus (DSM 19732)	GCF_000237085.1	Complex (High Doc) Acetobivrio	1	4897678	1	98.46 (50)	2.06
Acetivibrio mesophilus (N2K1)	GCF_004102745.1	Complex (High Doc) Acetobivrio	9	113652	93	98.76 (100)	1.09
Acetivibrio saccincola (GGR1)	GCF_002844395.1	Complex (High Doc) Acetobivrio	1	3604547	1	98.14 (100)	0.62
Acetivibrio straminisolvens (JCM 21531)	GCF_000521465.1	Complex (High Doc) Acetobivrio	26	48174	195	61.56 (33.3)	1.93
Acetivibrio thermocellus (ATCC 27405)	GCF_000015865.1	Complex (High Doc) Acetobivrio	1	3843301	1	98.45 (60)	1.31
Pseudobacteroides cellulosolvens (ATCC 35603/DSM 2933)	GCF_001262605.1	Complex (High Doc)	1	6878816	1	96.58 (50)	4.76
Ruminococcus champanellensis (18P13/JCM 17042)	GCF_000210095.1	Complex (High Doc) Ruminococcus	9	94004	92	96.97 (90)	1.1
Ruminococcus flavefaciens (007c)	GCF_000571935.1	Complex (High Doc) Ruminococcus	7	197742	39	98.54 (69.6)	2.79
Ruminococcus flavefaciens (17)	GCF_000247525.1	Complex (High Doc) Ruminococcus	103	10489	489	87.71 (4.3)	2.35
Ruminococcus flavefaciens (AE3010)	GCF_000526795.1	Complex (High Doc) Ruminococcus	1	3615639	3	98.94 (82.6)	0.07
Ruminococcus flavefaciens (SAb67)	GCF_900116855.1	Complex (High Doc) Ruminococcus	8	218744	36	99.3 (95.7)	2.32
Ruminococcus flavefaciens (YL228)	GCF_900119075.1	Complex (High Doc) Ruminococcus	4	309298	23	98.49 (65.2)	0.07
Clostridium cellulovorans (743B)	GCF_000145275.1	Simple (High Doc)	1	5262222	1	98.45 (100)	2.07
Clostridium sp. BNL1100	GCF_000244875.1	Simple (High Doc)	1	4613747	1	100 (100)	1.86
Ruminiclostridium cellulolyticum (H10)	GCF_000022065.1	Simple (High Doc)	1	4068724	1	98.76 (100)	3.26
Ruminiclostridium herbifermentans (MA18)	GCF_005473905.2	Simple (High Doc)	1	4817678	1	99.38 (100)	1.55
Ruminiclostridium hungatei (DSM 14427)	GCF_002051585.1	Simple (High Doc)	13	134613	100	100 (100)	1.09
Ruminiclostridium josui (JCM 17888)	GCF_000526495.1	Simple (High Doc)	1	3589078	2	99.38 (100)	2.02
Ruminiclostridium papyrosolvens (DSM 2782)	GCF_000175795.2	Simple (High Doc)	6	279057	31	97.52 (33.3)	2.95
Ruminiclostridium sufflavum (DSM 19573)	GCF_003208175.1	Simple (High Doc)	11	146149	74	98.76 (100)	3.1
Clostridium acetobutylicum (ATCC 824)	GCF_000008765.1	Simple (Low-Doc)	1	3940880	2	97.69 (52.9)	0.98
Clostridium bornimense (M2/40)	GCF_000577895.1	Simple (Low-Doc)	1	2917864	2	98.76 (100)	2.74
Clostridium cibarium (Sa3CVN1)	GCF_014836335.1	Simple (Low-Doc)	14	96365	81	98.76 (100)	0.8
Clostridium felsineum (DSM 794)	GCF_002006355.2	Simple (Low-Doc)	1	4885251	3	100 (100)	1.83
Clostridium pasteurianum (GL11)	GCF_001705235.1	Simple (Low-Doc)	1	4485768	2	70.9 (10)	16.44
Clostridium puniceum (DSM 2619)	GCF_002006345.1	Simple (Low-Doc)	31	68127	245	99.38 (100)	0.93
Clostridium saccharoperbutylacetonicum (N1-4(HMT))	GCF_000340885.1	Simple (Low-Doc)	1	6530257	2	99.38 (100)	2.8
Clostridium sp. CT7	GCF_002796935.1	Simple (Low-Doc)	1	4485768	2	100 (100)	2.66
Clostridium sp. DSM 8431	GCF_900116755.1	Simple (Low-Doc)	64	18890	334	98.14 (100)	0.93
Clostridium sp. HBUAS56017	GCF_007115085.1	Simple (Low-Doc)	17	82955	152	98.76 (100)	1.26
Clostridium sp. NJ4	GCF_003014985.1	Simple (Low-Doc)	2	773159	23	100 (100)	0.52
Clostridium sp. TW13	GCF_024345225.1	Simple (Low-Doc)	1	4546766	2	97.52 (100)	4.35
Clostridium sp. YIM B02555	GCF_022320955.1	Simple (Low-Doc)	9	182158	68	95.87 (100)	2.21
Herbinix luporum (AS08sgBPME 343)	GCF_012838165.1	Simple (Low-Doc)	14	59965	73	94.17 (66.7)	0.52
Inconstantimicrobium porci (SUG1517)	GCF_029219665.1	Simple (Low-Doc)	36	20976	253	96.54 (66.7)	9.25
Iocasia fonsfrigidae (NS-1)	GCF_017751145.1	Other	1	3926493	1	89.56 (100)	17.55
Lachnoclostridium sp. MSJ-17	GCF_018918205.1	Other	23	33648	126	77.18 (100)	2.77
Limihaloglobus sulfuriphilus (SM-Chi-D1)	GCF_001999965.1	Other	1	3868357	1	89.24 (100)	1.17
Paenibacillus guangzhouensis (KCTC 33171)	GCF_009363075.1	Other	1	6903680	2	99.61 (100)	0.57
Caption: List of the genome quality statistics for the species discussed in tables 1 and 2. The N50 contig value is the shortest length contig that when added with all other contigs greater in length sums to roughly 50% of the total assembly length. The L50 contig is the smallest number of contigs that make up 50% of the genome size.
