# Supplementary material for: A genomic analysis reveals the diversity of cellulosome displaying bacteria
Source: Front Microbiol. 2024 Oct 30;15:1473396. doi: 10.3389/fmicb.2024.1473396 (PMC11557425; doi:10.3389/fmicb.2024.1473396)
Supplement: Supplementary file 4 [file Table_3.XLSX]

## Sheet: Table S3
Table S3: Structurally Identified Cohesins in Ruminococcus-cellulosomes
Organism	Protein (WP Accession)	Identifier	Cohesin modules
Ruminococcus champanellensis (GCF_000210095.1)	WP_041326242.1*	Identifier	Coh	Coh
	*Truncated sequence, not found by PROKKA	CDD
		PFAM
		CBM2/3
		CATH 3D
		Lit	X	X
		AFold2
	WP_041326244.1*	Identifier	Coh	Coh	Coh	Coh	Coh	Coh	Coh
	*Truncated sequence, not found by PROKKA	CDD
		PFAM
		CBM2/3	X (10-110)	X (228-358)	X (405-532)
		CATH 3D	X (1-109)	X (223-363)	X (399-539)
		Lit	X	X	X	X	X	X	X
		AFold2	X (1-115)	X (217-361)	X (396-534)
	WP_015557817.1	Identifier	Coh
		CDD	X (30-142)
		PFAM	X (30-150)
		CBM2/3	X (30-151)
		CATH 3D	X (25-197)
		Lit	X
		AFold2	X (2-200)
	WP_015558622.1	Identifier	Coh
		CDD	X (30-175)
		PFAM	X (32-148)
		CBM2/3	X (29-195)
		CATH 3D	X (25-194)
		Lit	X
		AFold2	X (1-197)
	WP_015559126.1	Identifier	Coh
		CDD
		PFAM	X (35-180)
		CBM2/3	X (33-182)
		CATH 3D	X (21-187)
		Lit	X
		AFold2	X (32-181)
	WP_015558553.1	Identifier	Coh
		CDD
		PFAM
		CBM2/3
		CATH 3D	X (47-183)
		Lit	X
		AFold2	X (27-180)
	WP_015559212.1	Identifier	Coh
		CDD
		PFAM
		CBM2/3
		CATH 3D	X (55-217)
		Lit	X
		AFold2	X (44-217)
	WP_015559110.1	Identifier	Coh
		CDD	X (333-456)
		PFAM	X (332-458)
		CBM2/3	X (329-460)
		CATH 3D	X (325-464)
		Lit	X
		AFold2	X (326-465)
	WP_015558996.1	Identifier	Coh?	Coh
		CDD		X (219-280)
		PFAM		X (225-277)
		CBM2/3	X (134-207)	X (220-272)
		CATH 3D	X (98-206)	X (215-281)
		Lit		X
		AFold2		X (45-52) (137-283)
	WP_197533022.1	Identifier	Coh	Coh	Coh
		CDD	X (45-177)
		PFAM	X (50-179)
		CBM2/3	X (45-179)	X (212-342)	X (379-510)
		CATH 3D	X (36-181)	X (207-348)	X (377-512)
		Lit	X	X	X
		AFold2	X (1-182)	X (209-345)	X (378-511)
	WP_015559036.1	Identifier	Coh
		CDD
		PFAM
		CBM2/3	X (131-259)
		CATH 3D	X (127-266)
		Lit	X
		AFold2	X (125-262)
	PGHHMGEK_02154*	Identifier	Coh
	*Truncated sequence, not found by PROKKA	CDD
	No associated NCBI locus tag found	PFAM	X (7-131)
		CBM2/3	X (5-132)
		CATH 3D	X (1-137)
		Lit	X
		AFold2	X (1-134)
	WP_015557955.1	Identifier	Coh	Coh
		CDD
		PFAM
		CBM2/3
		CATH 3D	X (114-240)
		Lit
		AFold2	X (107-239)	X (1290-1300) (1398-1502)
Ruminococcus flavefaciens 17 (GCF_000247525.1)	NKKGHDFH_02132*	Identifier	Coh	Coh	Coh	Coh
	*Truncated sequence, not found by PROKKA	CDD
	No associated NCBI locus tag found	PFAM
		CBM2/3				X (146-277)
		CATH 3D			X (1-110)	X (127-282)
		Lit	X	X	X	X
		AFold2			X (1-110)	X (124-281)
	CAC34385*	Identifier	Coh	Coh	Coh	Coh	Coh	Coh	Coh
	*Truncated sequence, not found by PROKKA	CDD
	No associated NCBI locus tag found	PFAM
		CBM2/3
		CATH 3D
		Lit	X	X	X	X	X	X	X
		AFold2
	NKKGHDFH_02133	Identifier	Coh
	No associated NCBI locus tag found	CDD	X (3-148)
		PFAM	X (2-106)
		CBM2/3	X (22-150)
		CATH 3D	X (1-149)
		Lit	X
		AFold2	X (1-153)
	CAH18996*	Identifier	Coh
	*Truncated sequence, not found by PROKKA	CDD
		PFAM
		CBM2/3
		CATH 3D
		Lit	X
		AFold2
	WP_019679656.1	Identifier	Coh
		CDD
		PFAM
		CBM2/3
		CATH 3D	X (70-254)
		Lit	X
		AFold2	X (60-252)
	WP_019680574.1	Identifier	Coh
		CDD
		PFAM
		CBM2/3
		CATH 3D	X (1-161)
		Lit	X
		AFold2	X (1-161)
	WP_019680026*	Identifier	Coh
	*Truncated sequence, not found by PROKKA	CDD
	No associated NCBI locus tag found	PFAM
		CBM2/3
		CATH 3D
		Lit	X
		AFold2
	orf04875*	Identifier	Coh
	*Truncated sequence, not found by PROKKA	CDD
	No associated NCBI locus tag found	PFAM
		CBM2/3
		CATH 3D
		Lit	X
		AFold2
	orf02408*	Identifier	Coh
	*Truncated sequence, not found by PROKKA	CDD
	No associated NCBI locus tag found	PFAM
		CBM2/3
		CATH 3D
		Lit	X
		AFold2
	WP_019678998.1	Identifier	Coh
		CDD
		PFAM
		CBM2/3
		CATH 3D	X (18-151)
		Lit	X
		AFold2
	WP_019678123.1*	Identifier	Coh
	*Truncated sequence, not found by PROKKA	CDD
		PFAM
		CBM2/3
		CATH 3D
		Lit	X
		AFold2
	WP_019678225.1*	Identifier	Coh
	*Truncated sequence, not found by PROKKA	CDD
		PFAM
		CBM2/3
		CATH 3D
		Lit	X
		AFold2
	WP_019680026.1	Identifier	Coh?
		CDD
		PFAM
		CBM2/3	X (80-201)
		CATH 3D	X (28-236)
		Lit
		AFold2	X (58-236)
	WP_019679002.1	Identifier	Coh?
		CDD
		PFAM
		CBM2/3	X (236-284)
		CATH 3D	X (229-297)
		Lit
		AFold2	X (71-297)
R. flavefaciens 007c (GCF_000571935.1)	WP_037297368.1	Identifier	Coh	Coh	Coh	Coh
		CDD
		PFAM
		CBM2/3		X (298-427)	X (466-597)	X (637-768)
		CATH 3D		X (281-431)	X (448-602)	X (618-772)
		Lit	X	X	X	X
		AFold2	X (28-258)	X (282-427)	X (452-597)	X (622-768)
	EWM54563*	Identifier	Coh	Coh	Coh	Coh
	*Truncated sequence, not found by PROKKA	CDD
	No associated NCBI locus tag found	PFAM
		CBM2/3
		CATH 3D
		Lit	X	X	X	X
		AFold2
	WP_037297371.1	Identifier	Coh
		CDD	X (33-197)
		PFAM	X (33-156)
		CBM2/3	X (33-199)
		CATH 3D	X (28-198)
		Lit	X
		AFold2	X (1-201)
	WP_037301096.1	Identifier	Coh
		CDD
		PFAM
		CBM2/3
		CATH 3D	X (72-254)
		Lit	X
		AFold2	X (66-249)
	WP_037301218.1	Identifier	Coh
		CDD
		PFAM
		CBM2/3
		CATH 3D	X (76-276)
		Lit	X
		AFold2	X (69-252)
	WP_037299937.1	Identifier	Coh
		CDD
		PFAM	X (80-201)
		CBM2/3
		CATH 3D	X (27-236)
		Lit	X
		AFold2	X (57-236)
	WP_051456729.1	Identifier	Coh
		CDD
		PFAM
		CBM2/3
		CATH 3D	X (162-347)
		Lit	X
		AFold2	X (165-344)
	WP_037301009.1	Identifier	Coh
		CDD
		PFAM
		CBM2/3
		CATH 3D	X (178-363)
		Lit	X
		AFold2	X (207-363)
	WP_037297301.1	Identifier	Coh
		CDD
		PFAM
		CBM2/3
		CATH 3D	X (28-178)
		Lit	X
		AFold2	X (45-181)
	WP_037297319.1	Identifier	Coh?
		CDD
		PFAM
		CBM2/3
		CATH 3D	X (24-213)
		Lit
		AFold2	X (28-211)
	WP_037297815.1	Identifier	Coh
		CDD
		PFAM
		CBM2/3
		CATH 3D
		Lit
		AFold2	X (598-786)
Ruminococcus flavefaciens AE3010 (GCF_000526795.1)	WP_024860406.1	Identifier	Coh
		CDD
		PFAM
		CBM2/3
		CATH 3D	X (24-168)
		Lit
		AFold2	X (27-187)
	WP_024860516.1	Identifier	Coh
		CDD
		PFAM
		CBM2/3
		CATH 3D	X (661-846)
		Lit
		AFold2	X (667-845)
	WP_024861015.1	Identifier	Coh
		CDD
		PFAM
		CBM2/3	X (78-202)
		CATH 3D	X (44-235)
		Lit
		AFold2	X (56-235)
	WP_024861561.1	Identifier	Coh
		CDD	X (32-195)
		PFAM	X (32-151)
		CBM2/3	X (32-198)
		CATH 3D	X (27-197)
		Lit
		AFold2	X (22-204)
	WP_024861562.1	Identifier	Coh	Coh	Coh
		CDD
		PFAM
		CBM2/3		X (303-433)	X (473-603)
		CATH 3D		X (284-438)	X (454-607)
		Lit
		AFold2	X (27-255)	X (288-438)	X (460-606)
	WP_051463400.1	Identifier	Coh	Coh	Coh	Coh	Coh	Coh
		CDD
		PFAM	X (57-184)	X (193-325)	X (335-467)	X (480-607)		X (915-1049)
		CBM2/3	X (56-186)	X (192-327)	X (334-469)	X (481-609)	X (653-778)	X (912-1050)
		CATH 3D	X (53-188)	X (189-330)	X (331-471)	X (472-611)	X (630-782)	X (907-1052)
		Lit
		AFold2	X (53-188)	X (189-329)	X (330-471)	X (474-614)	X (634-782)	X (910-1053)
	WP_024861564.1	Identifier	Coh
		CDD
		PFAM
		CBM2/3
		CATH 3D	X (19-204)
		Lit
		AFold2	X (28-201)
	WP_024861581.1	Identifier	Coh
		CDD
		PFAM
		CBM2/3	X (232-278)
		CATH 3D	X (220-291)
		Lit
		AFold2	X (66-286)
	WP_024861775.1	Identifier	Coh
		CDD
		PFAM
		CBM2/3
		CATH 3D	X (81-265)
		Lit
		AFold2	X (109-264)
	WP_024861903.1	Identifier	Coh
		CDD
		PFAM
		CBM2/3
		CATH 3D	X (72-252)
		Lit
		AFold2	X (65-249)
	WP_024861959.1	Identifier	Coh
		CDD
		PFAM
		CBM2/3
		CATH 3D	X (311-500)
		Lit
		AFold2	X (317-500)
Ruminococcus flavefaciens SAb67 (GCF_900116855.1)	WP_109726120.1	Identifier	Coh
		CDD
		PFAM	X (76-194)
		CBM2/3	X (75-198)
		CATH 3D	X (46-232)
		Lit
		AFold2	X (49-232)
	WP_146198176.1	Identifier	Coh
		CDD
		PFAM
		CBM2/3
		CATH 3D	X (206-390)
		Lit
		AFold2	X (233-390)
	WP_181380219.1	Identifier	Coh	Coh
		CDD
		PFAM
		CBM2/3	X (34-162)	X (172-305)
		CATH 3D	X (28-159)	X (160-309)
		Lit
		AFold2	X (26-164)	X (167-3060
	WP_109725648.1	Identifier	Coh
		CDD
		PFAM
		CBM2/3
		CATH 3D	X (73-253)
		Lit
		AFold2	X (61-247)
	WP_109726423.1	Identifier	Coh
		CDD	X (33-197)
		PFAM	X (33-157)
		CBM2/3	X (33-199)
		CATH 3D	X (28-198)
		Lit
		AFold2	X (1-204)
	WP_109726424.1	Identifier	Coh	Coh	Coh
		CDD
		PFAM
		CBM2/3
		CATH 3D		X (283-436)	X (456-610)
		Lit
		AFold2	X (1-261)	X (283-434)	X (456-607)
	WP_109726425.1	Identifier	Coh	Coh	Coh	Coh	Coh	Coh
		CDD
		PFAM	X (58-186)	X (195-327)	X (336-467)	X (476-604)	X (643-774)	X (989-1122)
		CBM2/3	X (56-187)	X (193-329)	X (334-469)	X (474-606)	X (639-777)	X (988-1124)
		CATH 3D	X (53-190)	X (191-331)	X (332-471)	X (472-611)	X (635-781)	X (983-1127)
		Lit
		AFold2	X (53-190)	X (191-330)	X (332-470)	X (471-607)	X (633-779)	X (985-1123)
	WP_146198169.1	Identifier	Coh
		CDD
		PFAM
		CBM2/3
		CATH 3D	X (23-213)
		Lit
		AFold2	X (28-209)
	WP_109726444.1	Identifier	Coh
		CDD
		PFAM
		CBM2/3	X (240-296)
		CATH 3D	X (234-306)
		Lit
		AFold2	X (158-301)
Ruminococcus flavefaciens YL228 (GCF_900119075.1)	WP_072299948.1	Identifier	Coh
		CDD
		PFAM	X (77-197)
		CBM2/3	X (77-202)
		CATH 3D	X (56-234)
		Lit
		AFold2	X (55-234)
	WP_072299383.1	Identifier	Coh
		CDD
		PFAM
		CBM2/3	X (527-693)
		CATH 3D
		Lit
		AFold2	X (512-719)
	WP_000000000.1	Identifier	Coh
		CDD
		PFAM
		CBM2/3
		CATH 3D	X (886-1110)
		Lit
		AFold2	X (891-1111)
	WP_072300803.1	Identifier	Coh	Coh
		CDD
		PFAM
		CBM2/3		X (173-302)
		CATH 3D	X (31-164)	X (169-310)
		Lit
		AFold2	X (31-169)	X (171-310)
	WP_072300561.1	Identifier	Coh
		CDD	X (32-176)
		PFAM	X (32-151)
		CBM2/3	X (32-198)
		CATH 3D	X (27-197)
		Lit
		AFold2	X (3-202)
	WP_072300562.1	Identifier	Coh	Coh	Coh
		CDD
		PFAM
		CBM2/3		X (304-432)	X (481-606)
		CATH 3D		X (284-436)	X (458-612)
		Lit
		AFold2	X (1-253)	X (290-434)	X (460-608)
	WP_072300565.1	Identifier	Coh	Coh	Coh	Coh	Coh	Coh
		CDD
		PFAM	X (57-184)	X (193-324)	X (333-465)	X (478-605)		X (880-1014)
		CBM2/3	X (56-185)	X (191-325)	X (332-467)	X (479-607)	X (652-780)	X (877-1014)
		CATH 3D	X (53-188)	X (189-328)	X (329-468)	X (472-611)	X (631-785)	X (872-1021)
		Lit
		AFold2	X (48-188)	X (189-326)	X (329-468)	X (471-607)	X (632-781)	X (876-1017)
	WP_072300570.1	Identifier	Coh
		CDD
		PFAM
		CBM2/3
		CATH 3D	X (21-200)
		Lit
		AFold2	X (28-203)
	WP_072300594.1	Identifier	Coh
		CDD
		PFAM
		CBM2/3	X (232-281)
		CATH 3D	X (220-293)
		Lit
		AFold2	X (144-291)
	WP_072300670.1	Identifier	Coh
		CDD
		PFAM
		CBM2/3	X (573-726)
		CATH 3D	X (70-253)
		Lit
		AFold2	X (555-733)
	WP_072300966.1	Identifier	Coh
		CDD
		PFAM
		CBM2/3
		CATH 3D	X (70-253)
		Lit
		AFold2	X (65-248)							8
Caption: Presented are the cohesin-containing proteins for the Ruminococcus cellulosome producing species discussed in this work, which include: R. champanellensis and 5 strains of R. flavefaciens (007c, 17, AE3010, SAb67, YL228). For each cohesin module in each protein listed, we have indicated if it was identified as a cohesin by any of the PFAM, CDD, or superfamily identifiers employed in this…
