# Supplementary material for: A genomic analysis reveals the diversity of cellulosome displaying bacteria
Source: Front Microbiol. 2024 Oct 30;15:1473396. doi: 10.3389/fmicb.2024.1473396 (PMC11557425; doi:10.3389/fmicb.2024.1473396)
Supplement: Supplementary file 5 [file Table_4.xlsx]

## Sheet: TableS4
Table S4: Complete Cellulosome Associated Protein Counts
	Organism	Subsp.	GCF	Temperature	Isolation Location	Simple Primary	Complex Primary	Mono. Adaptor	Poly. Adaptor	SLH Anchoring	NonSLH Anchoring	Cell-Free	Free Cohesin	coh1 (cd08548)	coh2 (cd08547)	coh3 (cd08759)	coh (PF00963)	Total Scaffoldin	doc1 (cd14256)	doc2 (cd14254)	doc3 (cd14255)	doc (PS51766)	Total Dockerin	DocCAZyme	DocGH-Cell	DocGH-Hemi	DocGH-Oligo	DocGH-LCB	FreeCazyme	FreeGH-Cell	FreeGH-Hemi	FreeGH-Oligo	FreeGH-LCB	CBM(cell)-GH-LCB	CBM(cell)-SLH	CBM(cell)-GH-Cell	CBM(hemi)-GH-hemi	CBM(hemi)-GH-LCB	RsgI
1	Acetivibrio alkalicellulosi	DSM 17461	2509887034	Mesophilic	Deposits of soda lake	0	1	5	6	4	1	2	2	12	10	0	21	22	135	0	0	139	140	58	29	21	0	50	62	4	12	5	16	35	6	16	1	1	7
2	Acetivibrio cellulolyticus	CD2	GCF_000179595.2	Mesophilic	Sewage sludge	0	1	3	1	5	1	3	2	12	5	0	15	16	136	1	0	141	141	68	36	16	0	52	57	7	0	7	7	24	2	17	3	3	14
3	Acetivibrio clariflavus	DSM 19732	GCF_000237085.1	Thermophilic	Methanogenic sludge of a cellulose-degrading bioreactor	0	1	1	2	4	1	4	0	10	4	0	12	13	77	0	0	81	81	44	19	15	0	34	44	2	7	4	9	19	2	10	1	1	10
4	Acetivibrio mesophilus	N2K1	GCF_004102745.1	Thermophilic (45C)	Methanogenic sludge of a cellulose-degrading bioreactor	0	1	1	0	4	1	1	1	4	4	0	9	9	69	0	0	74	74	53	26	16	0	41	45	6	3	9	9	26	4	16	1	1	9
5	Acetivibrio saccincola	GGR1	GCF_002844395.1	Thermophilic	Methanogenic sludge of a cellulose-degrading bioreactor	0	1	1	0	5	2	3	1	6	7	0	14	14	63	1	0	65	65	42	21	13	0	34	45	3	7	6	10	24	2	13	1	1	10
6	Acetivibrio straminisolvens	JCM 21531	GCF_000521465.1	Thermophilic	-	0	0	1	0	2	2	3	3	4	6	0	12	12	68	1	0	75	75	38	19	11	0	30	78	27	8	8	34	18	1	11	1	1	8
7	Acetivibrio thermocellus	ATCC 27405	GCF_000015865.1	Thermophilic	Sewage digester sludge	0	1	0	0	4	1	1	1	3	4	0	8	8	71	1	0	73	73	52	25	15	0	39	31	6	2	5	8	24	3	16	1	1	9
8	Pseudobacteroides cellulosolvens	DSM 2933	GCF_001262605.1	Thermophilic	Compost	2	1	10	3	8	3	3	3	11	19	0	33	33	20	133	0	189	206	92	49	21	0	70	101	12	17	10	29	43	7	28	2	2	14
																													0
1	Ruminococcus champanellensis	18P13	GCF_000210095.1	Mesophilic	Human feces	0	0	4	0	0	0	0	2	4	1	0	7	7	65	0	0	58	65	33	14	11	0	24	42	6	2	4	8	11	0	6	3	3	0
2	Ruminococcus flavefaciens	007c	GCF_000571935.1	-	-	0	0	1	0	0	0	0	0	1	0	0	1	1	101	0	22	141	154	53	19	16	0	35	52	6	11	6	16	16	0	8	3	3	0
3	Ruminococcus flavefaciens	17	GCF_000247525.1	-	-	0	0	1	0	0	0	0	0	1	0	0	1	1	91	0	21	123	135	35	13	12	0	25	48	4	9	4	13	10	0	5	2	2	0
4	Ruminococcus flavefaciens	AE3010	GCF_000526795.1	-	-	0	0	1	0	0	0	1	1	1	0	0	3	3	117	0	27	138	161	70	19	29	0	48	40	6	5	6	11	22	0	8	2	2	0
5	Ruminococcus flavefaciens	SAb67	GCF_900116855.1	-	-	0	0	2	0	0	0	1	1	3	0	0	4	4	81	0	18	114	121	49	16	17	0	33	50	6	5	6	11	17	0	7	5	6	0
6	Ruminococcus flavefaciens	YL228	GCF_900119075.1	-	-	0	0	1	0	0	0	1	1	1	0	0	3	3	105	0	26	134	142	62	18	25	0	43	44	7	6	8	13	21	0	8	2	2	0
																													0
1	Clostridium cellulovorans	743B	GCF_000145275.1	Mesophilic	Wood fermenter	3	0	0	0	0	1	0	7	4	7	0	4	11	43	0	0	43	43	33	20	7	0	27	134	12	20	18	31	16	0	13	4	5	1
2	Clostridium sp. BNL1100	BNL1100	GCF_000244875.1	Mesophilic	Corn stover	1	0	0	0	0	0	0	1	2	0	0	2	2	71	0	0	73	73	54	23	12	0	35	69	6	15	11	21	18	3	9	3	3	1
3	Ruminiclostridium cellulolyticum	H10	GCF_000022065.1	Mesophilic	Compost	1	0	0	0	0	0	0	2	2	1	0	2	3	60	0	0	62	62	46	21	10	0	31	65	6	10	14	16	17	4	10	2	2	1
4	Ruminiclostridium herbifermentans	MA18	GCF_005473905.2	Mesophilic	Biogas reactor fed with maize silage	4	0	0	0	0	0	0	5	6	3	0	7	9	80	0	0	80	80	58	26	14	0	40	53	3	4	10	7	18	1	11	1	1	0
5	Ruminiclostridium hungatei	DSM 14427	GCF_002051585.1	Mesophilic	Soil	1	0	0	0	0	0	0	4	2	2	0	3	5	40	0	0	40	40	29	17	5	0	22	79	5	13	13	18	12	2	9	1	1	0
6	Ruminiclostridium josui	JCM 17888	GCF_000526495.1	Mesophilic	Compost	1	0	0	0	0	0	0	2	2	1	0	3	3	71	0	0	73	73	50	22	12	0	34	66	6	11	11	17	18	2	10	1	1	0
7	Ruminiclostridium papyrosolvens	DSM 2782	GCF_000175795.2	Mesophilic	Paper mill	1	0	1	0	0	0	0	1	2	1	0	3	3	70	0	0	72	72	47	23	10	0	33	84	5	11	15	16	19	4	11	1	1	1
8	Ruminiclostridium sufflavum	DSM 17464	GCF_003208175.1	Mesophilic	Methanogenic reactor	1	0	0	0	0	0	1	3	3	2	0	3	5	54	0	0	54	54	39	21	5	0	26	44	2	3	7	5	11	2	9	1	1	0
																													0
1	Clostridium acetobutylicum	ATCC 824	GCF_000008765.1	Mesophilic	Cornmeal	1	0	0	0	0	0	0	1	2	0	0	2	2	10	0	0	10	10	9	9	0	0	9	117	5	17	11	22	5	0	3	0	1	1
2	Clostridium bornimense	M2/40	GCF_000577895.1	Mesophilic	Biogas reactor fed with maize silage	1	0	0	0	0	0	1	0	2	0	0	2	2	4	0	0	4	4	3	3	0	0	3	55	4	2	4	6	2	0	1	0	1	1
3	Clostridium cibarium	Sa3CVN1	GCF_014836335.1	Mesophilic	Chicken feces	1	0	0	0	0	1	0	0	1	1	0	1	2	11	5	0	12	17	9	8	0	0	8	148	9	18	17	27	9	0	5	0	1	2
4	Clostridium felsineum	DSM 794	GCF_002006355.2	Mesophilic	Retting plant material	1	0	2	0	0	0	0	1	2	2	0	2	4	12	1	0	13	13	9	9	0	0	9	176	9	20	21	29	6	0	5	0	1	0
5	Clostridium pasteurianum	GL11	GCF_001705235.1	Mesophilic	Anaerobic reactor degrading propionate	1	0	1	0	0	0	0	1	2	1	0	2	3	9	1	0	10	10	8	8	0	0	8	144	7	9	16	16	7	0	4	0	1	0
6	Clostridium puniceum	DSM 2619	GCF_002006345.1	Mesophilic	Rotting potatoes	1	0	0	0	0	0	0	1	1	1	0	1	2	12	0	0	12	12	11	9	1	0	10	210	7	17	44	24	7	0	3	1	3	2
7	Clostridium saccharoperbutylacetonicum	N1-4(HMT)	GCF_000340885.1	Mesophilic	Soil	1	0	0	0	0	0	0	1	1	1	0	1	2	8	0	0	8	8	7	6	1	0	7	238	8	23	42	31	7	0	3	0	0	2
8	Clostridium sp. CT7	CT7	GCF_002796935.1	Mesophilic	Soil	1	0	1	0	0	0	0	1	2	1	0	2	3	9	1	0	10	10	8	8	0	0	8	144	7	9	16	16	7	0	4	0	1	0
9	Clostridium sp. DSM 8431	DSM 8431	GCF_900116755.1	Mesophilic	Bison rumen	1	0	0	0	0	1	0	0	1	1	0	2	2	11	0	0	11	11	10	9	1	0	10	89	6	5	7	11	6	0	5	1	3	1
10	Clostridium sp. HBUAS56017	HBUAS56017	GCF_007115085.1	Mesophilic	Fermented food	0	0	0	0	0	1	1	1	1	2	0	1	3	11	4	0	12	16	9	8	0	0	8	152	9	18	17	27	9	0	5	0	1	2
11	Clostridium sp. NJ4	NJ4	GCF_003014985.1		Soil	1	0	0	0	0	0	0	1	2	0	0	2	2	10	0	0	10	10	9	9	0	0	9	117	5	17	11	22	5	0	3	0	1	1
12	Clostridium sp. TW13	TW13	GCF_024345225.1			1	0	0	0	0	0	0	0	1	0	0	1	1	3	0	0	3	3	3	3	0	0	3	142	4	8	25	12	1	0	0	1	2	0
13	Clostridium sp. YIM B02555	YIM B02555	GCF_022320955.1		Anaerobe	1	0	0	0	0	0	0	1	1	1	0	1	2	8	0	0	8	8	7	6	1	0	7	234	8	19	45	27	6	0	3	0	0	2
14	Herbinix luporum	AS08sgBPME_343	GCF_012838165.1	Thermophile	Thermophilic biogas plant	1	0	0	0	0	1	0	0	1	1	0	1	2	7	0	0	7	7	7	3	1	0	4	54	10	10	5	20	14	0	8	0	1	0
15	Inconstantimicrobium porci	DSM 17466	GCF_029219665.1	Mesophilic	Pig feces	1	0	0	0	0	0	0	0	1	0	0	1	1	5	0	0	5	5	4	4	0	0	4	52	1	1	4	2	2	0	1	0	1	1
																													0
1	Iocasia fonsfrigidae	NS-1	GCF_017751145.1	Mesophilic	Deep-sea sediment	0	0	0	0	0	0	1	1	1	1	0	2	2	1	0	0	1	1	1	1	0	0	1	61	4	4	8	8	3	0	2	0	0	0
2	Lachnoclostridium sp. MSJ-17	MSJ-17	GCF_018918205.1		Primate feces	0	0	0	1	0	0	0	4	0	4	0	2	5	38	0	0	32	39	2	0	1	0	1	19	0	0	1	0	0	0	0	0	0	0
3	Limihaloglobus sulfuriphilus	SM-Chi-D1	GCF_001999965.1	Mesophilic	Sediment of evaporation pond	0	0	0	1	0	0	0	0	1	1	0	1	1	5	2	0	9	14	1	1	0	0	1	122	2	8	31	10	0	0	0	0	0	0
4	Paenibacillus guangzhouensis	KCTC 33171	GCF_009363075.1	Mesophilic	Soil	0	0	28	0	5	0	0	2	2	32	0	32	35	3	26	0	24	29	7	0	1	0	1	248	7	3	49	10	5	3	3	0	0	0
Caption: This table is an extension of Table 1 and Table 2 with additional counts of proteins for each organism. Highlighted columns are those that were not included in Table 1 or Table 2 including; individual cohesin-type identifiers (coh1 (cd08548), coh2 (cd08547), coh3 (cd08759), coh (PF00963)), individual dockerin-type identifiers (doc1 (cd14256), doc2 (cd14254), doc3 (cd14255), doc (PS51766)…
