# Supplementary material for: A genomic analysis reveals the diversity of cellulosome displaying bacteria
Source: Front Microbiol. 2024 Oct 30;15:1473396. doi: 10.3389/fmicb.2024.1473396 (PMC11557425; doi:10.3389/fmicb.2024.1473396)
Supplement: Supplementary file 6 [file Table_5.xlsx]

## Sheet: Sheet1
Table S5: Cellulosome Related Domain Identifiers
Cohesin Domain Name	Cohesin Domain ID	Dockerin Domain Name	Dockerin Domain ID	SLH Domain Name	SLH Domain ID	Alt'd Anchoring Domain Name	Alt'd Anchoring Domain ID	X Domain Name	X Domain ID	GH Domain Name	GH Domain ID	CBM Domain Name	CBM Domain ID	PL Domain Name	PL Domain ID	CE Domain Name	CE Domain ID	RsgI Domain Name	RSGI Domain ID
Coh1	cd08548	Doc1	cd14256	SLH_IPR	IPR001119	LysM	PF01476	X_PFAM	PF03442	GH1	PF00232	CBM2	PF00553	PL1	PF00544	CE1	PF00756	RSGI_Nterm_PFAM	PF12791
Coh2	cd08547	Doc2	cd14254	SLH_PS	PS51272	WXL	PF13731	X_SF	SSF49464	GH2	PF02837	CBM3	PF00942	PL4	PF09284	CE2(N)	PF17996	RSGI_Nterm_PS	PS51849
Coh3	cd08759	Doc3	cd14255	SLH_PF	PF00395	SH3-3	PF08239	X_IP	IPR008969	GH3	PF00933	CBM4	PF02018	PL10	PF09492	CE3	PF00657
Cohesin (general)	PF00963	Dockerin (general)	PS51766			Sh3-5	PF08460			GH4	PF02056	CBM5/12	PF02839	PL11	cd10318	CE4	PF01522
						Sh3-6	PF12913			GH5	PF00150	CBM6	PF03422	PL33	PF07940	CE6	PF03629
						Sh3-7	PF12914			GH6	PF01341	CBM9	PF06452			CE7	PF05448
						Sh3-8	PF13457			GH7	PF00840	CBM10	PF02013			CE8	PF01095
						SPOR	PF05036			GH8	PF01270	CBM11	PF03425			CE9	PF01979
						CW-7	PF08230			GH9	PF00759	CBM13	PF00652			CE12	cd00229
						PGB1	PF01471			GH10	PF00331	CBM15	PF03426			CE15	SSF53474
						PGB2	PF08823			GH11	PF00457	CBM17/28	PF03424
						CWB1	PF01473			GH12	PF01670	CBM18	PF00187
						CWB2	PF04122			GH13	PF02903	CBM19	PF03427
						ChW	PF07538			GH14	PF01373	CBM20	PF00686
						Fn3	SM00060			GH15	PF00723	CBM21	PF03370
						CuAmOx	PF07833			GH16	PF00722	CBM25	PF03423
						LPXTG	PF00746			GH18	PF00704	CBM27	PF09212
										GH19	PF00182	CBM28/17	PF03424
										GH20	PF00728	CBM32	PF18344
										GH24	PF00959	CBM33	PF03067
										GH25	PF01183	CBM35	PF16990
										GH26	PF02156	CBM42	PF05270
										GH27	PF02065	CBM48	PF02922
										GH28	PF00295	CBM49	PF09478
										GH29	PF01120	CBM64	PF18666
										GH30	PF-2-55	CBM77	PF18283
										GH31	PF01055
										GH32	PF00251
										GH33	PF02973
										GH35	PF01301
										GH36	PF02065
										GH38	PF01074
										GH39	PF01229
										GH42	PF02449
										GH43	PF04616
										GH44	PF12891
										GH45	PF02015
										GH47	PF01532
										GH48	PF02011
										GH51	PF06964
										GH52	PF03512
										GH53	PF07745
										GH57	PF03065
										GH59	PF02057
										GH61	PF03443
										GH62	PF03664
										GH64	PS52006
										GH65	PF03636
										GH67	PF03648
										GH68	PF02435
										GH73	PF01832
										GH76	PF03663
										GH77	PF02446
										GH78	PF05592
										GH88	PF07470
										GH92	PF07971
										GH97	PF10566
										GH98	PF08306
										GH113	cd19606
										GH114	PF03537
										GH134	PF21087
Caption: A comprehensive list of all the domain identifiers that were used in the analysis. For the SLH and X domain, multiple identifiers from three different databases (Interpro, Prosite, and PFam) were used to ensure all occurrences of these domains were accounted for. For cohesin and dockerin domains there are individual identifiers for the three different types and a general identifier that …
